# Supplementary material
Source: PubMed Central journal article supplement (PMC6817977)
Supplement: NIHMS1056080-supplement-Supporting_Information.pdf [file NIHMS1056080-supplement-Supporting_Information.pdf]

## Supporting Information

### Structural elucidation of bisulfite adducts to pseudouridine that result in deletion signatures during reverse transcription of RNA

Aaron M. Fleming,<sup>†</sup> Anton Alenko,<sup>†</sup> Jay P. Kitt,<sup>†</sup> Anita M. Orendt,<sup>†‡</sup> Peter F. Flynn,<sup>†</sup>

Joel M. Harris,<sup>†</sup> and Cynthia J. Burrows<sup>\*†</sup>

<sup>†</sup>Department of Chemistry, University of Utah, Salt Lake City, UT 84112-0850, United States

<sup>‡</sup>Center for High Performance Computing, University of Utah, Salt Lake City, UT 84112-0190, United States

\*To whom correspondence should be addressed [burrows@chem.utah.edu](mailto:burrows@chem.utah.edu)

| <b>Item</b>                                                                                                | <b>Page</b> |
|------------------------------------------------------------------------------------------------------------|-------------|
| <b>Additional Methods</b>                                                                                  | S2          |
| <b>Figure S1.</b> ESI-MS and ESI-MS/MS spectra for the bisulfite adducts.                                  | S3          |
| <b>Figure S2.</b> <sup>1</sup> H-NMR for <b>1</b> .                                                        | S9          |
| <b>Figure S3.</b> <sup>1</sup> H, <sup>1</sup> H-COSY for <b>1</b> .                                       | S10         |
| <b>Figure S4.</b> <sup>1</sup> H, <sup>1</sup> H-TOCSY for <b>1</b> .                                      | S11         |
| <b>Figure S5.</b> <sup>13</sup> C-NMR for <b>1</b> .                                                       | S12         |
| <b>Figure S6.</b> <sup>1</sup> H, <sup>13</sup> C-HSQC for <b>1</b> .                                      | S13         |
| <b>Figure S7.</b> <sup>1</sup> H-NMR for <b>5</b> .                                                        | S14         |
| <b>Figure S8.</b> <sup>1</sup> H, <sup>1</sup> H-COSY for <b>5</b> .                                       | S15         |
| <b>Figure S9.</b> <sup>1</sup> H, <sup>1</sup> H-TOCSY for <b>5</b> .                                      | S16         |
| <b>Figure S10.</b> <sup>13</sup> C-NMR for <b>5</b> .                                                      | S17         |
| <b>Figure S11.</b> <sup>1</sup> H, <sup>13</sup> C-HSQC for <b>5</b> .                                     | S18         |
| <b>Figure S12.</b> Raman spectra for <b>1</b> and <b>5</b> .                                               | S19         |
| <b>Figure S13.</b> DFT optimized energy and coordinates for the ( <i>S</i> ) isomer of the <i>S</i> adduct | S20         |
| <b>Figure S14.</b> DFT optimized energy and coordinates for the ( <i>R</i> ) isomer of the <i>O</i> adduct | S21         |
| <b>Figure S15.</b> Decomposition pathways for <b>2</b> , <b>3</b> , <b>4</b> , and <b>6</b> .              | S22         |
| <b>Figure S16.</b> <sup>1</sup> H-NMR for <b>2</b> .                                                       | S23         |
| <b>Figure S17.</b> <sup>13</sup> C-NMR for <b>2</b> .                                                      | S24         |
| <b>Figure S18.</b> Anion-exchange HPLC analysis of bisulfite treated RNA.                                  | S25         |
| <b>Figure S19.</b> UV-vis spectra for <b>2</b> , <b>3</b> , <b>4</b> , and <b>6</b> .                      | S26         |
| <b>Figure S20.</b> pH titrations of <b>Ψ</b> , <b>1</b> , and <b>5</b> monitored by UV-vis.                | S27         |

## Additional Methods

**Labeling of the DNA primer.** To monitor progression of primer extension by reverse transcriptases via polyacrylamide gel electrophoresis (PAGE), the DNA primer was 5' end-labeled with  $^{32}\text{P}$  following a procedure adopted from the literature (Fleming, A. M., Muller, J. G., Dlouhy, A. C., and Burrows, C. J. (2012) *J. Am. Chem. Soc.* 134, 15091-15102) using T4 polynucleotide kinase (New England Biolabs, Ipswich, MA.) and [ $\gamma$ - $^{32}\text{P}$ ] ATP (PerkinElmer, Waltham, MA.).

**Primer extension assay.** Before all primer extension assays, samples were annealed by heating 6.5  $\mu\text{L}$  of aqueous solution containing reverse transcription buffer with no magnesium (75 mM KCl, 50 mM Tris-HCl pH 8.3 in a final volume of 10  $\mu\text{L}$ ), 1.17 pmol (117 nM in 10  $\mu\text{L}$ ) of HPLC purified RNA template before or after bisulfite treatment, and 1.06 pmol (106 nM in 10  $\mu\text{L}$ ) DNA primer including  $\sim 30,000$  cpm of  $^{32}\text{P}$ -labeled strand to 95  $^{\circ}\text{C}$  for 5 min, then incubating them at 55  $^{\circ}\text{C}$  for another 5 min followed by cooling at 15  $^{\circ}\text{C}$  for 10 min. Upon completion of annealing, stock solutions of  $\text{MgCl}_2$  (3 mM in 10  $\mu\text{L}$ ), DTT (10 mM in 10  $\mu\text{L}$ ), and dNTPs (500  $\mu\text{M}$ ) were added to the reaction mixture to bring the volume to 9  $\mu\text{L}$ . Then 1  $\mu\text{L}$  of stock solution containing 100 U of SuperScript<sup>TM</sup> III (Invitrogen, Carlsbad, CA) in 50% glycerol was added to give a final volume of 10  $\mu\text{L}$ . Reaction mixtures were incubated for 40 min at 35-50 $^{\circ}\text{C}$  followed by 10 min at 93 $^{\circ}\text{C}$  to facilitate degradation of enzyme and RNA template. Reaction mixture was then diluted with an equal volume of 2x gel loading buffer (8 M urea, 0.01% xylene cyanole, 0.01% bromphenol blue, x1 TBE buffer) and heated to 95  $^{\circ}\text{C}$  for 10 min. Resulting solutions were analyzed on 20% denaturing PAGE. Gels were stored with a storage phosphor screen for 12-18 hours which was then scanned using a phosphoimager. The resulting images were analyzed using ImageJ2 software. (Schindelin, J., Rueden, C. T., Hiner, M. C., and Eliceiri, K. W. (2015) *Mol. Reprod. Dev.* 82, 518-529)

**Raman spectroscopic characterization.** Raman spectroscopy was utilized to characterize the the C-SO<sub>3</sub> connectivity between compounds 1 and 5. Raman measurements were carried out on a confocal Raman microscope. Details of the instrumentation have been published previously (Houlne, M. P.; Sjoström, C. M.; Uibel, R. H.; Kleimeyer, J. A.; Harris, J. M. (2002) *Anal. Chem.* 74, 4311-9). Measurement of Raman spectra of compounds 1 and 5 were carried out in a microscopy well cell (Kitt, J.P., Harris, J.M. (2014) *Anal. Chem.* 86, 3, 1719-1725). A small volume of solution was placed in the well cell and the confocal probe was translated into solution. The Raman excitation source was a Kr<sup>+</sup> laser operating at 50 mW and spectra were collected for not more than two minutes. Three spectra were collected from each sample. The spectra were baseline corrected using a custom Matlab<sup>TM</sup> script which fits a 7<sup>th</sup>-order polynomial to non-peak containing portions of the spectrum. Baseline corrected spectra were normalized to the C-H stretching region of the spectrum to correct for concentration differences and to highlight distinctive Raman bands in each sample. The spectra in Figure S12 are the average of the three normalized spectra from each sample. References for the C-S and S=O vibrational assignments are provided in the manuscript. The psuedouracil band assignments are from Ueda, T., Shinozaki, K., Ushizawa, K., Tsuboi, M. (1997) *J. Raman Spectrosc.* 28, 947-952.

**Figure S1.** ESI-MS and ESI-MS/MS spectra for the bisulfite adducts.

**ESI-MS for 1**

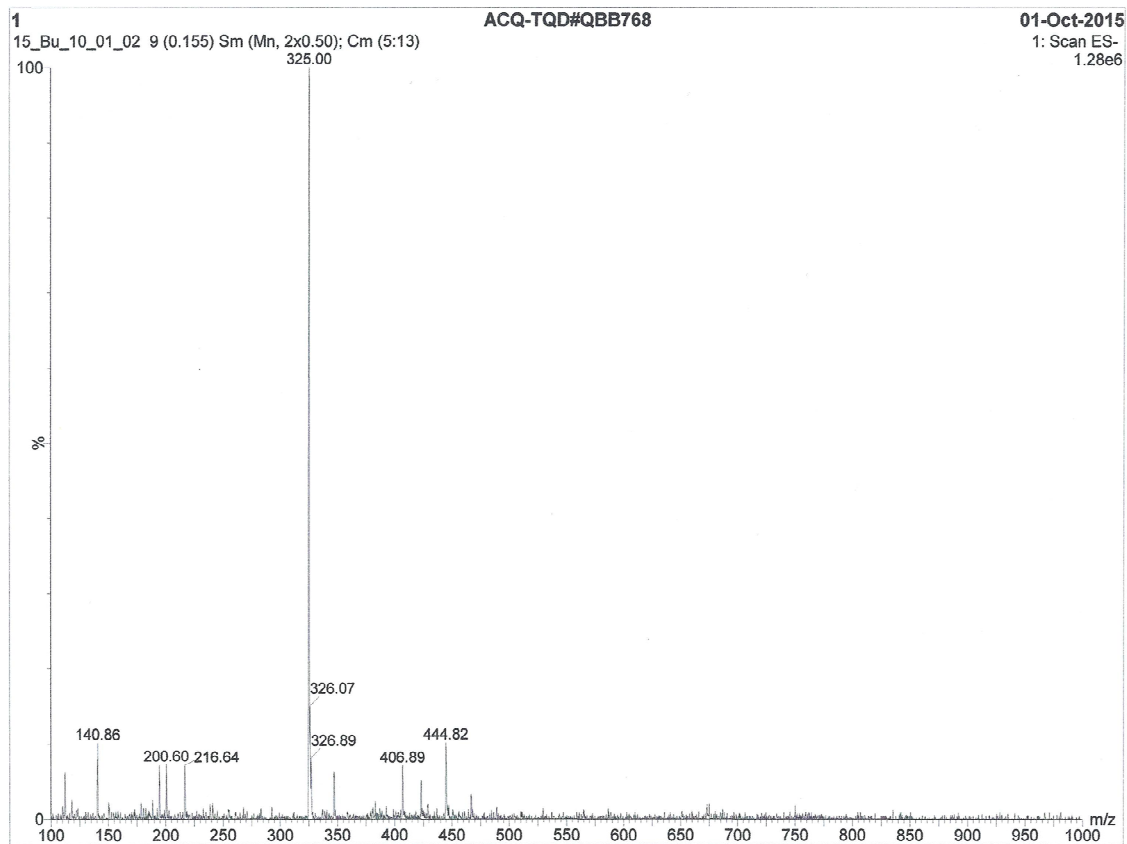

**ESI-MS/MS for 1**

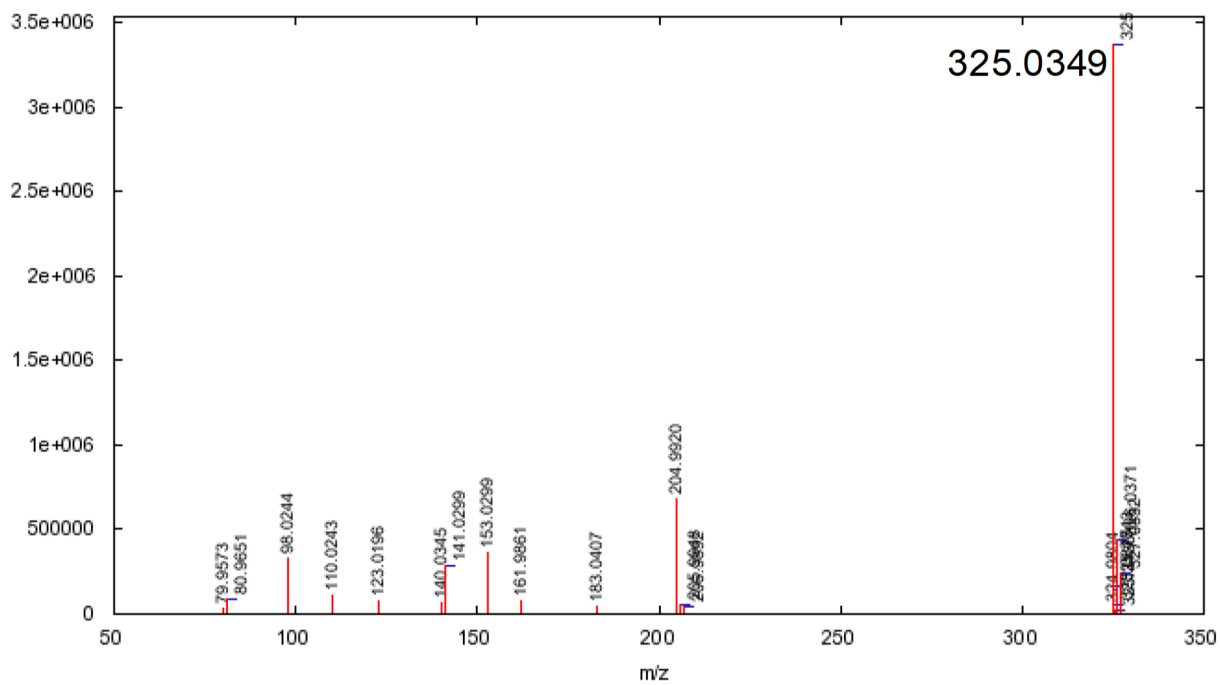

# ESI-MS for 2

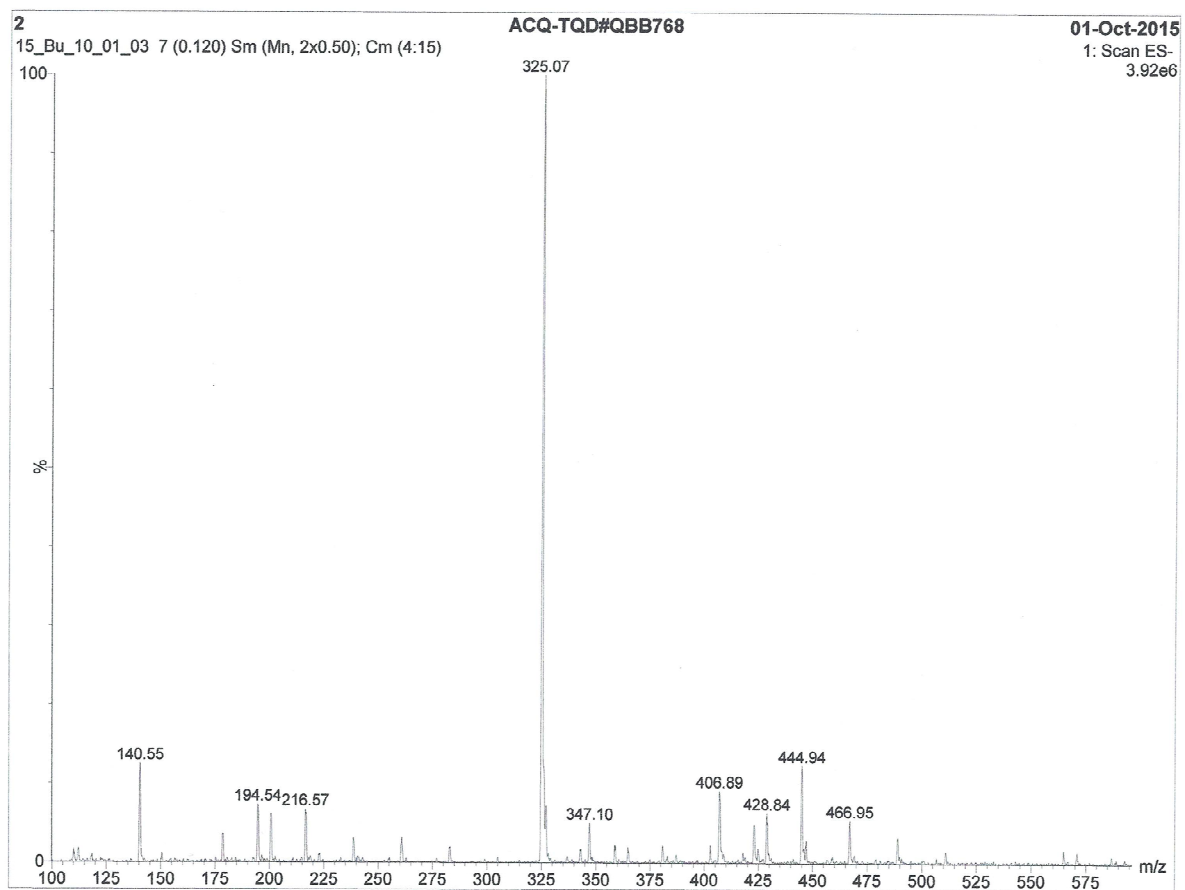

# ESI-MS for 3

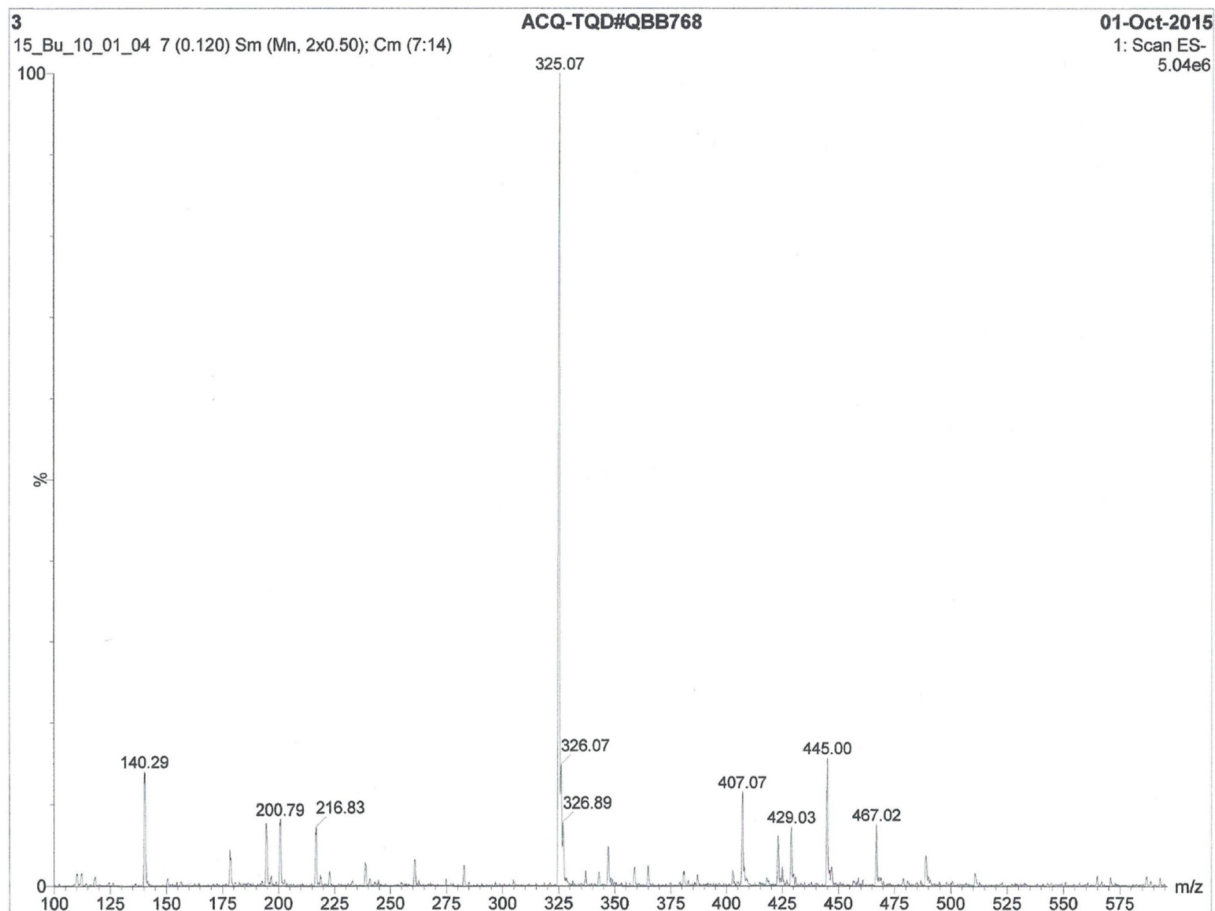

# ESI-MS for 4

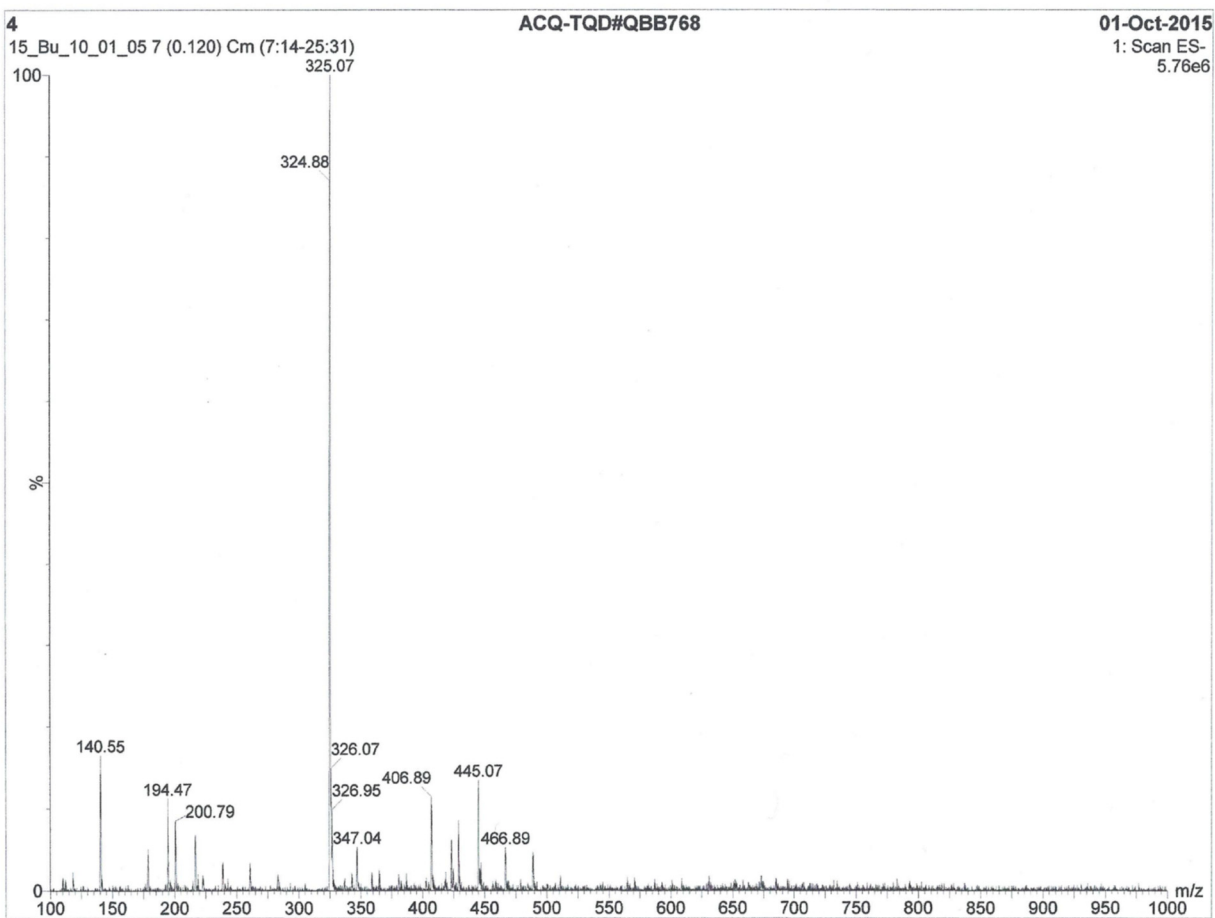

# ESI-MS for 5

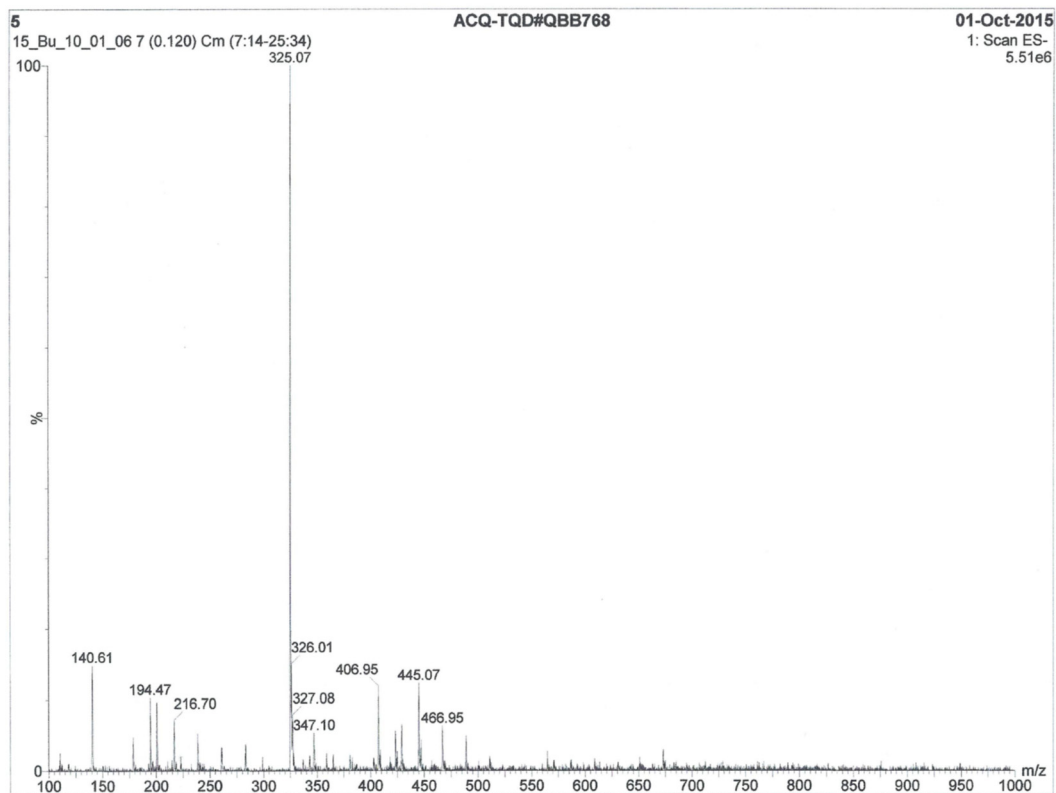

# ESI-MS/MS for 5

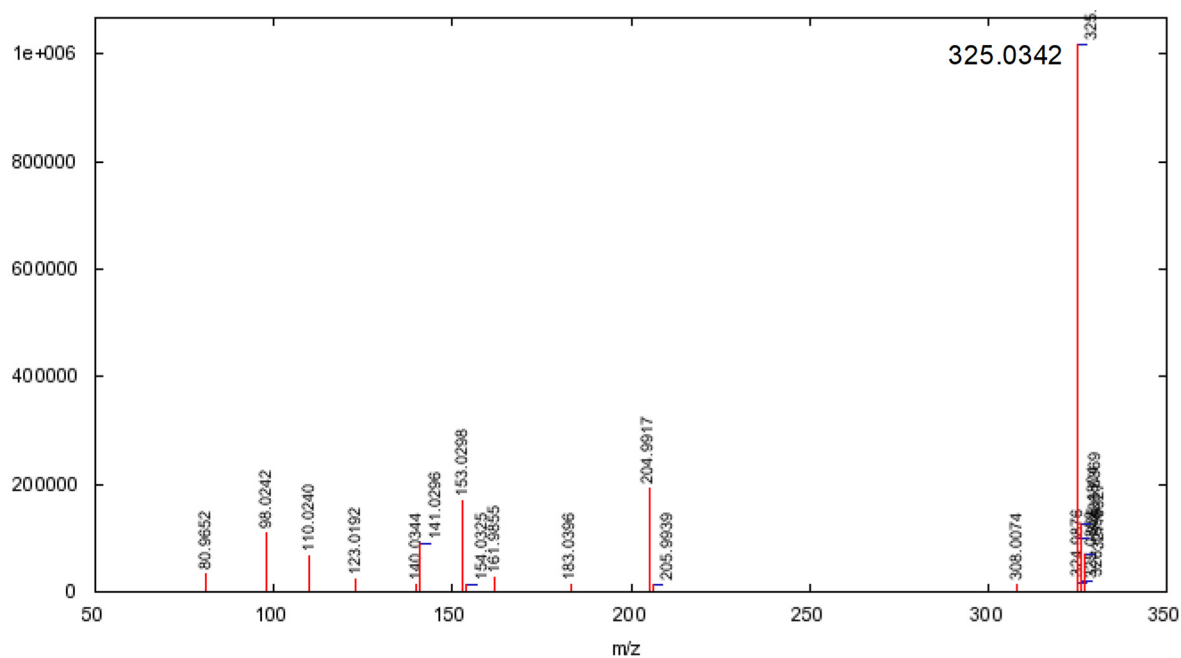

# ESI-MS for 6

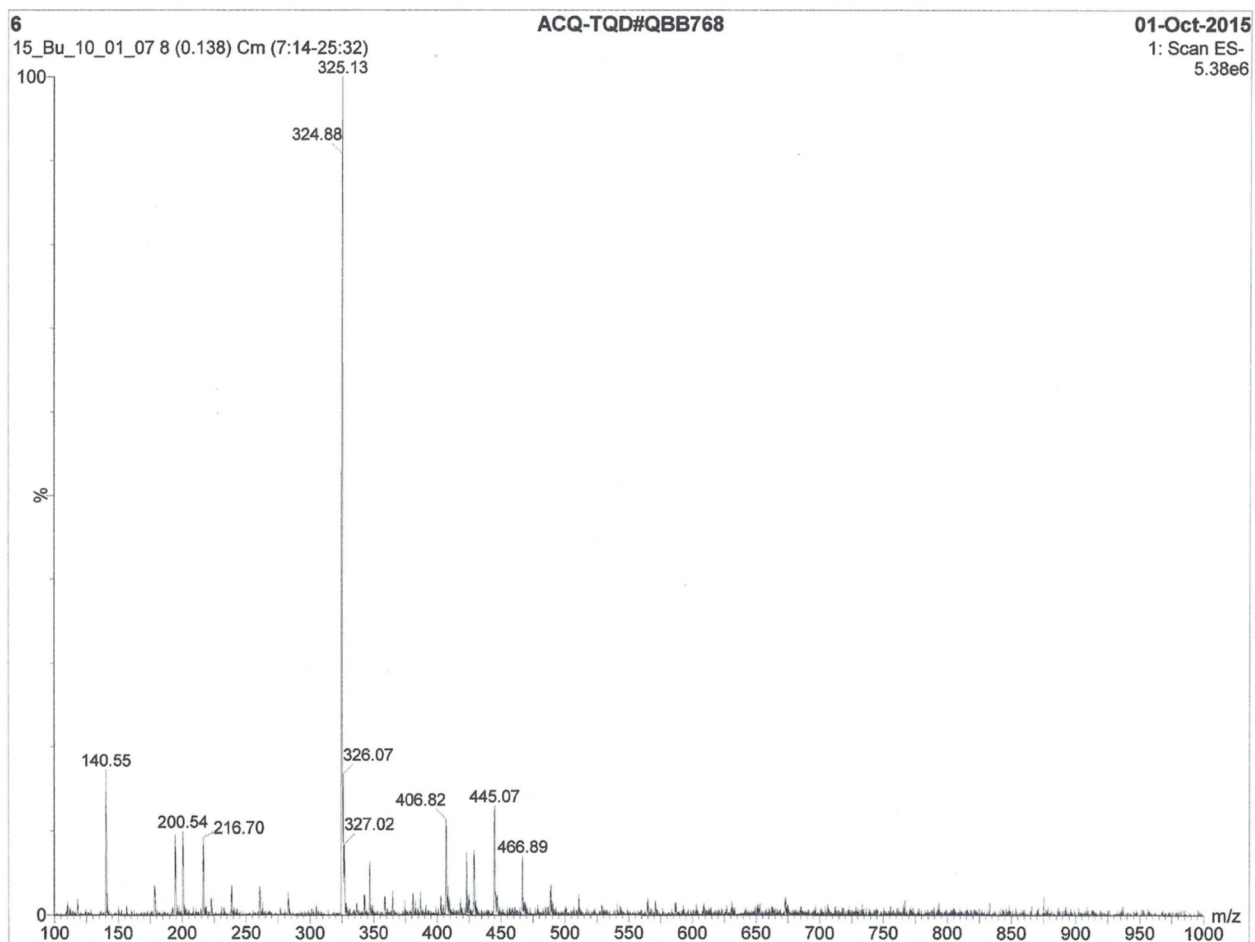



**Figure S2.**  $^1\text{H-NMR}$  for **1**.

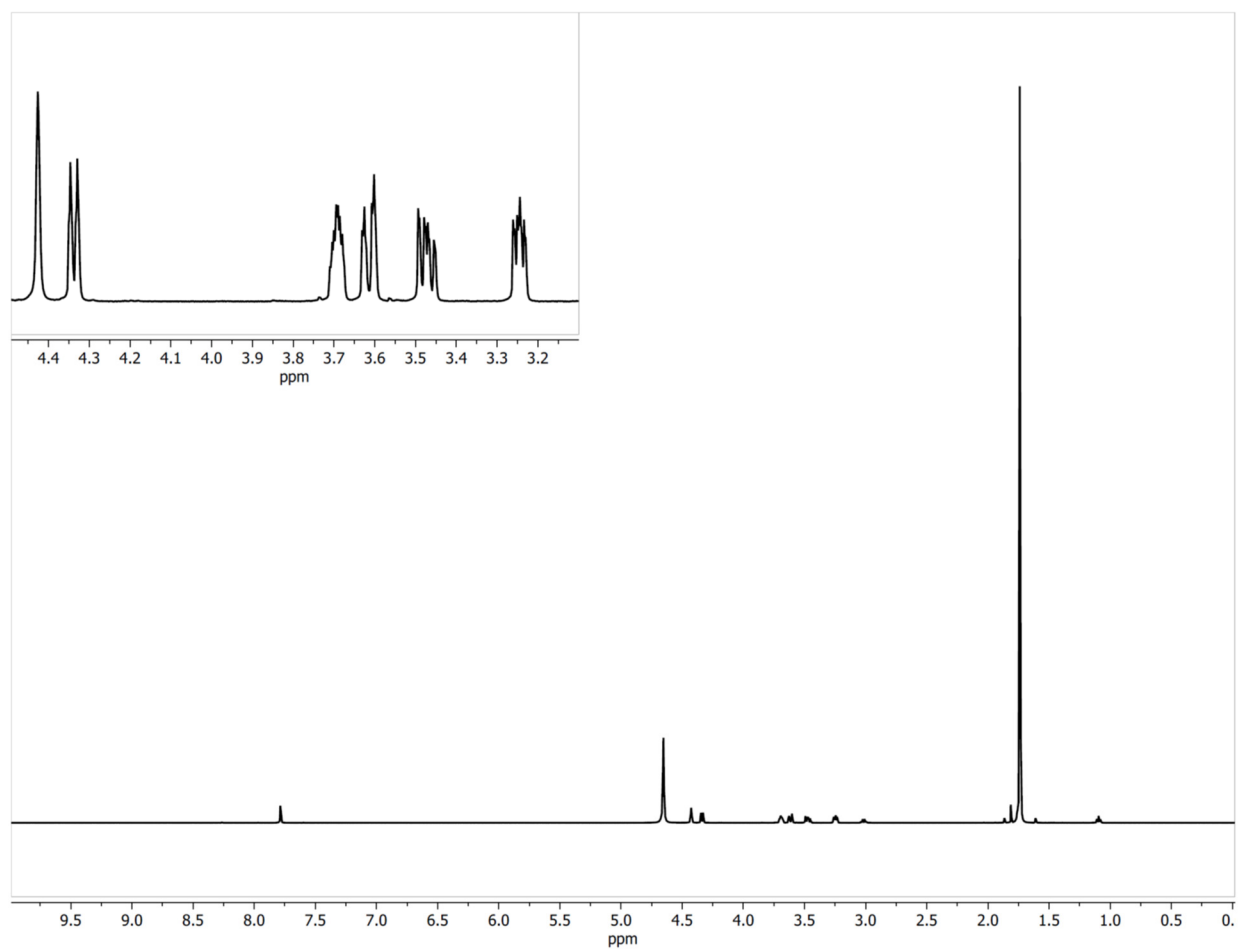

**Table of  $^1\text{H-NMR}$  Signals**

| Proton | $\delta$ ppm ( $\text{D}_2\text{O}$ ) |
|--------|---------------------------------------|
| 1'     | 4.40                                  |
| 2'     | 4.31                                  |
| 3'     | 3.22                                  |
| 4'     | 3.67                                  |
| 5'A    | 3.61                                  |
| 5'B    | 3.45                                  |
| 6      | 7.76                                  |

There exists acetate as an impurity in the spectrum from the HPLC purification.

**Figure S3.**  $^1\text{H},^1\text{H}$ -COSY for **1**.

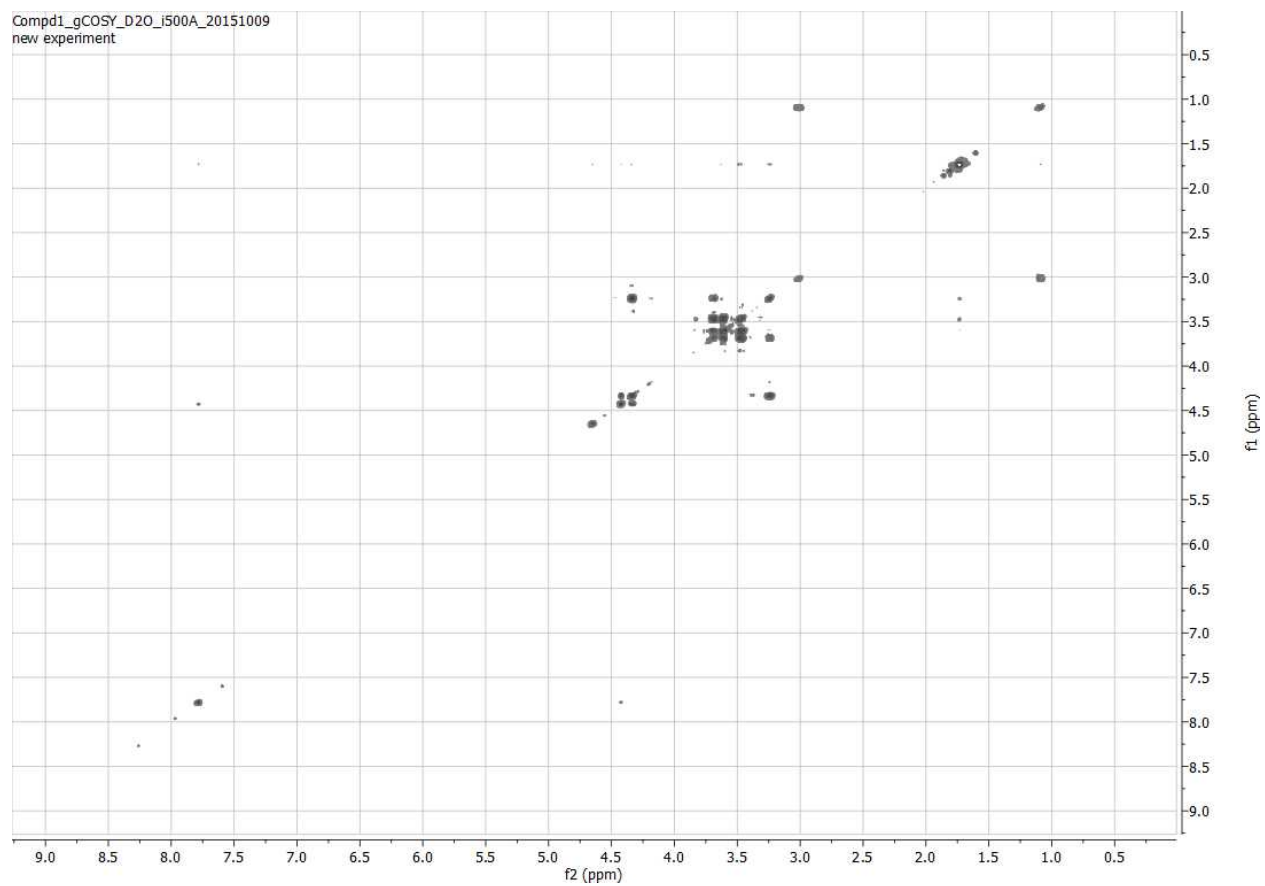

**Figure S4.**  $^1\text{H},^1\text{H}$ -TOCSY for **1**.

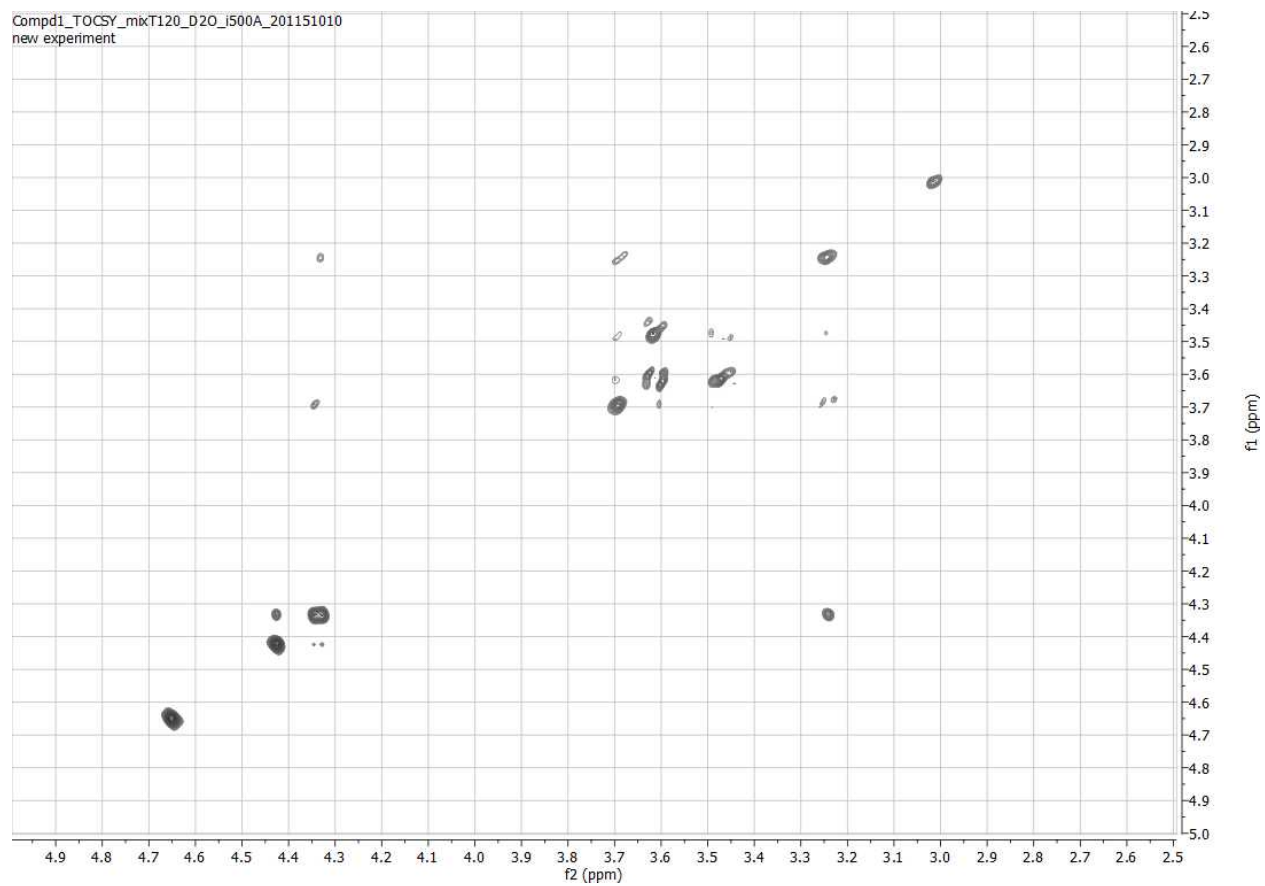

**Figure S5.**  $^{13}\text{C}$ -NMR for **1**.

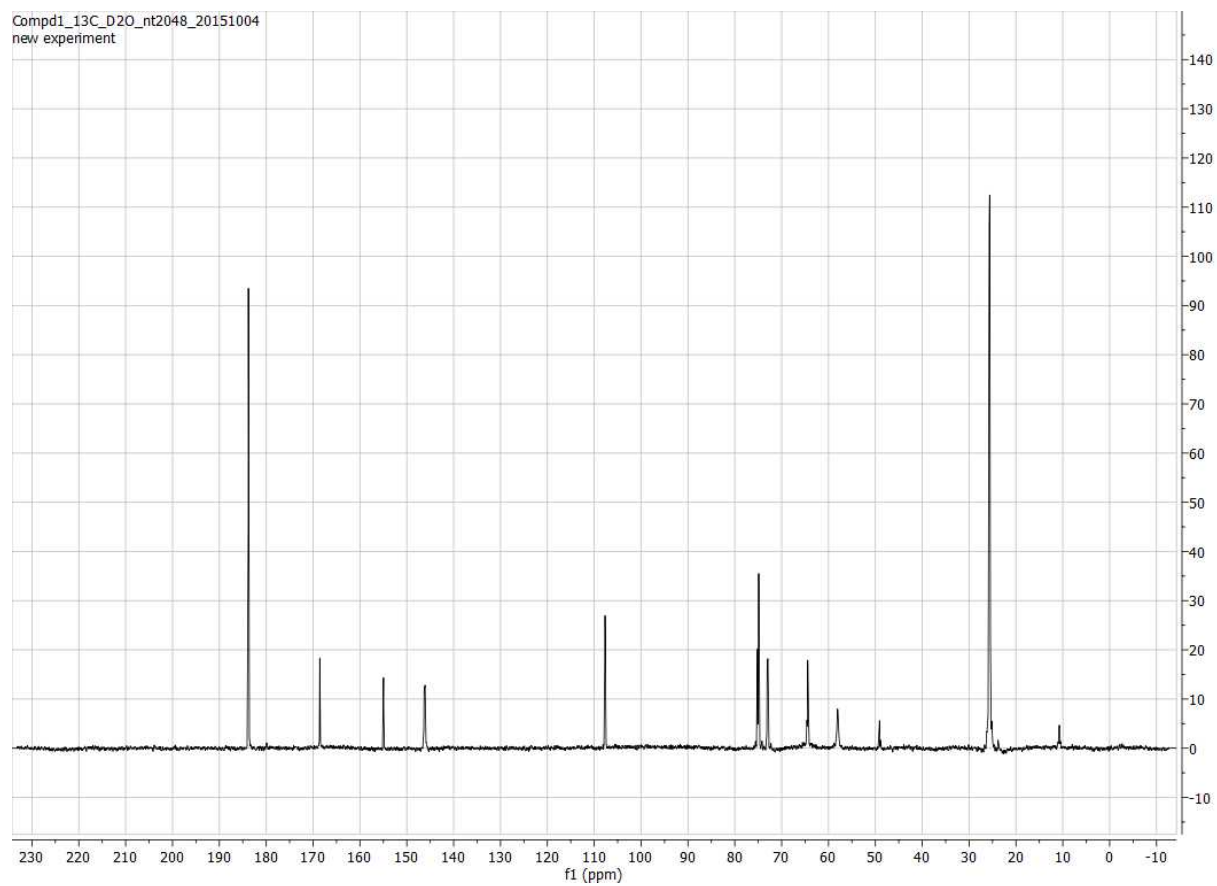

**Table of  $^{13}\text{C}$ -NMR Shifts**

| Proton | $\delta$ ppm ( $\text{D}_2\text{O}$ ) |
|--------|---------------------------------------|
| 1'     | 58.1                                  |
| 2'     | 73.0                                  |
| 3'     | 75.2                                  |
| 4'     | 74.9                                  |
| 5'     | 64.5                                  |
| 2      | 154.9                                 |
| 4      | 168.6                                 |
| 5      | 107.7                                 |
| 6      | 146.1                                 |

There exists acetate as an impurity in the spectrum from the HPLC purification.

**Figure S6.**  $^1\text{H}, ^{13}\text{C}$ -HSQC for **1**.

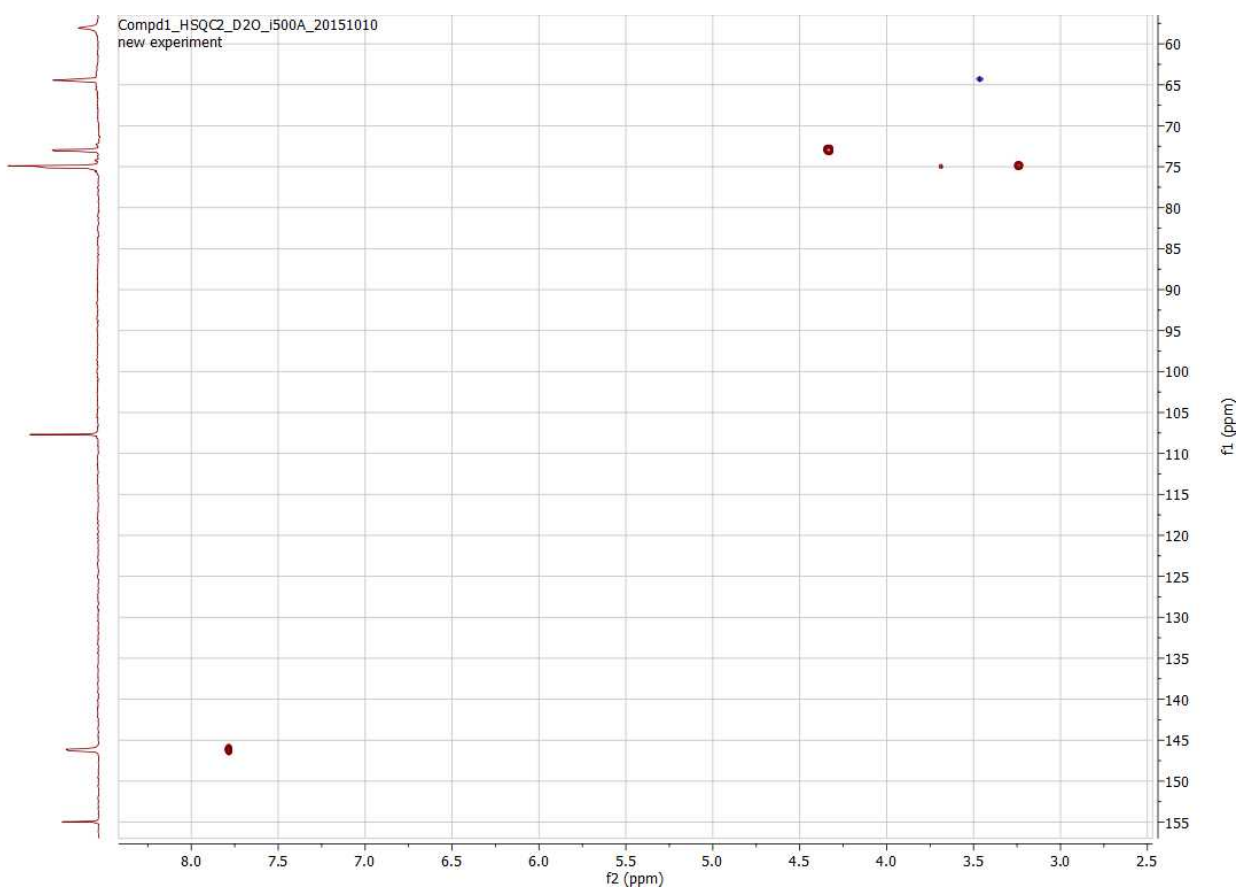

**Figure S7.**  $^1\text{H-NMR}$  for **5**.

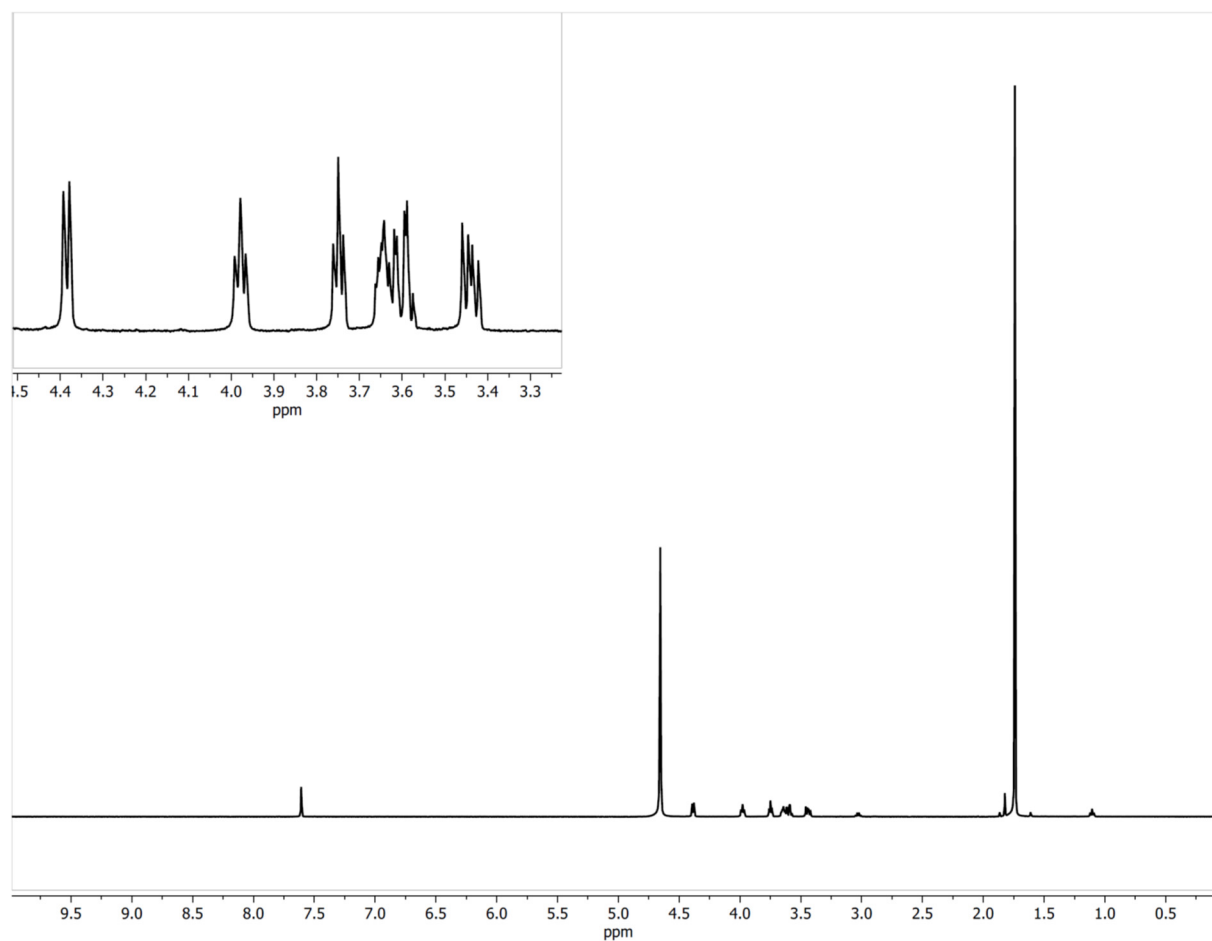

**Table of  $^1\text{H-NMR}$  Signals**

| Proton | $\delta$ ppm ( $\text{D}_2\text{O}$ ) |
|--------|---------------------------------------|
| 1'     | 4.39                                  |
| 2'     | 3.98                                  |
| 3'     | 3.75                                  |
| 4'     | 3.65                                  |
| 5'A    | 3.58                                  |
| 5'B    | 3.44                                  |
| 6      | 7.61                                  |

There exists acetate as an impurity in the spectrum from the HPLC purification.

**Figure S8.**  $^1\text{H},^1\text{H}$ -COSY for **5**.

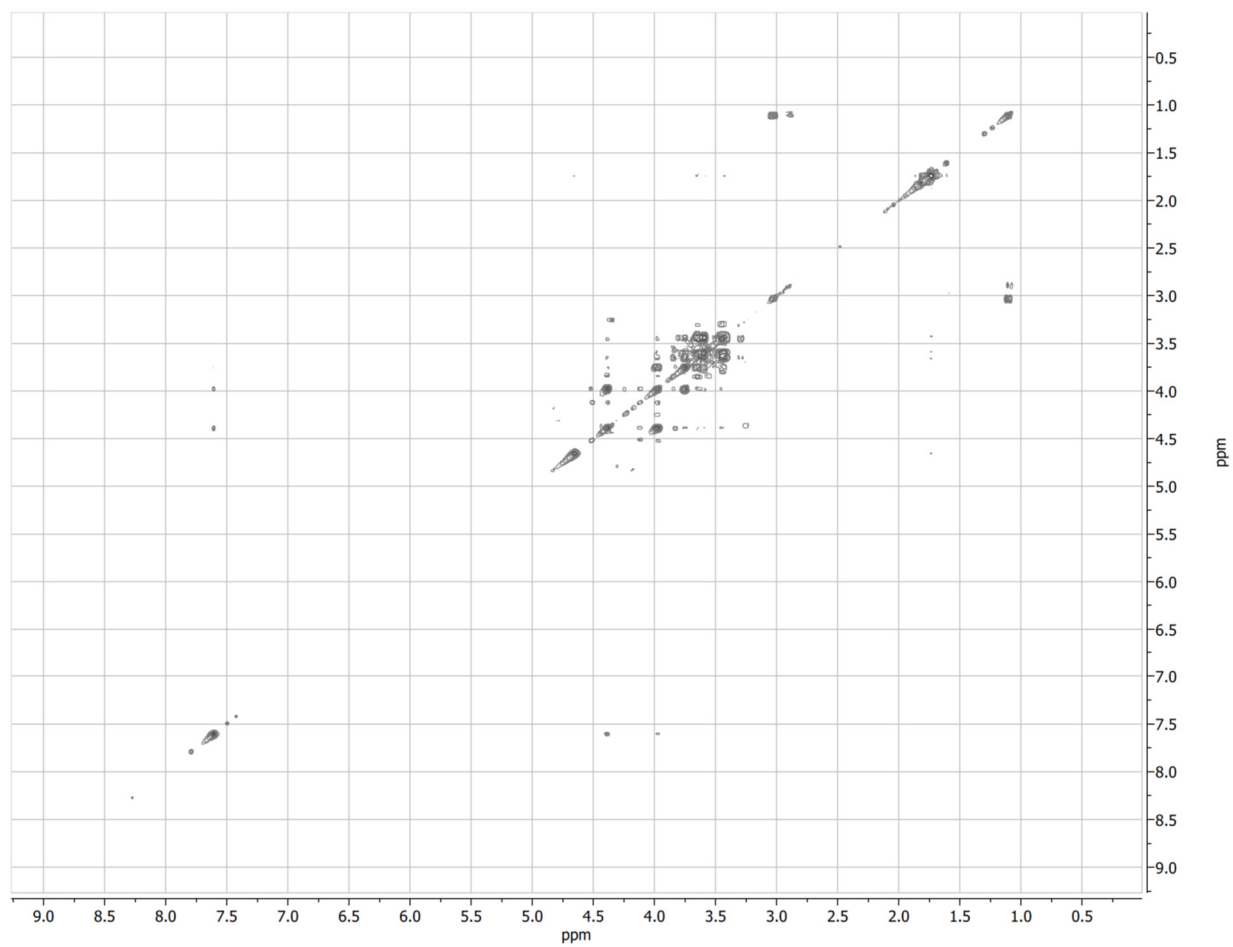

**Figure S9.**  $^1\text{H},^1\text{H}$ -TOCSY for **5**.

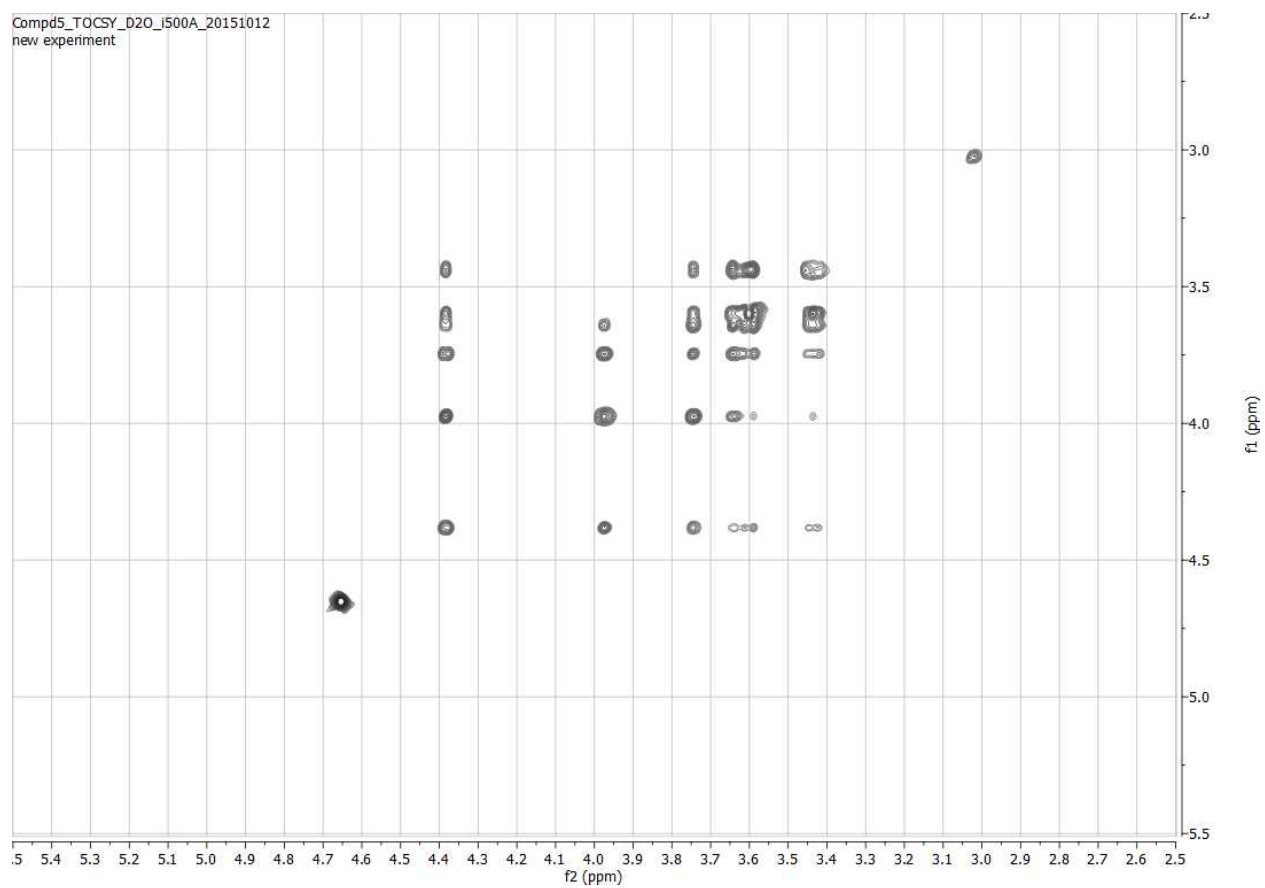



**Figure S10.**  $^{13}\text{C}$ -NMR for **5**.

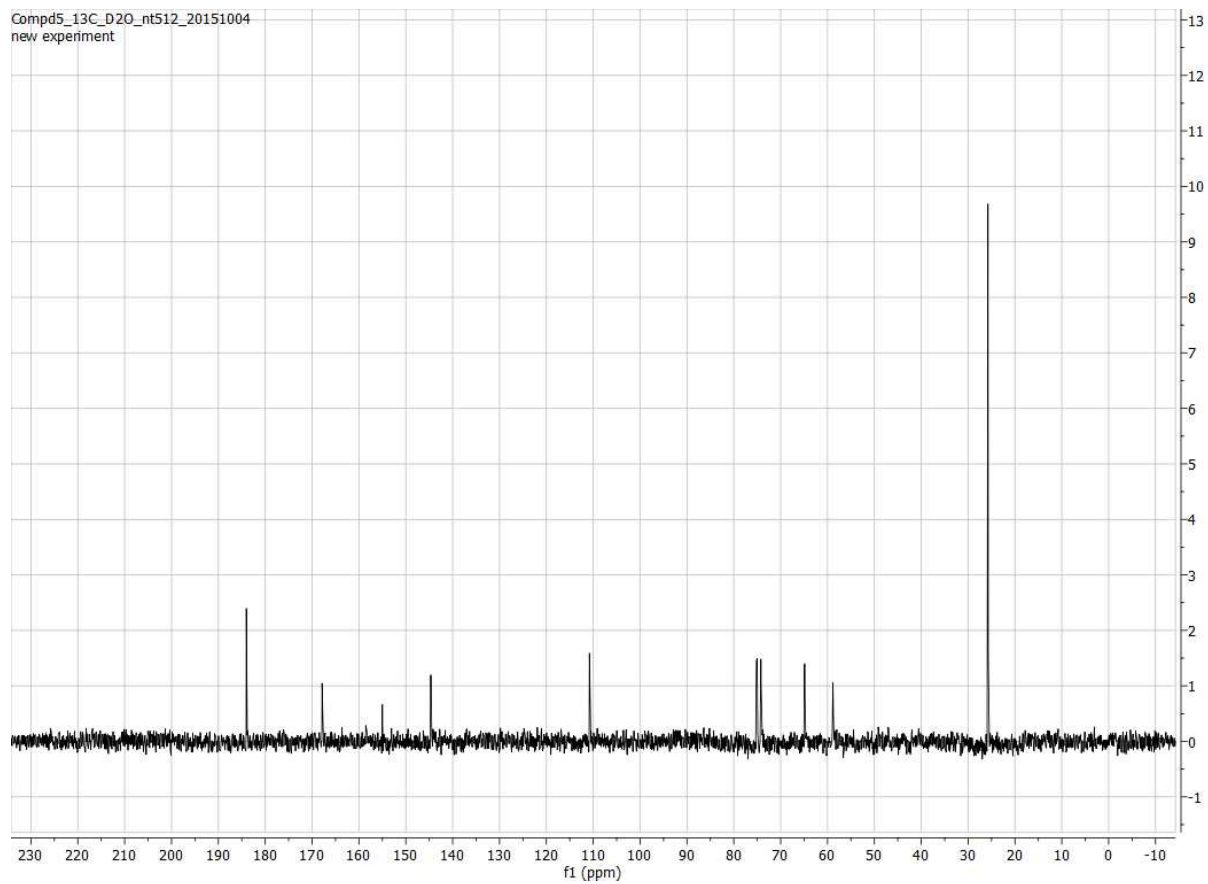

**Table of  $^{13}\text{C}$ -NMR Shifts**

| Proton | $\delta$ ppm ( $\text{D}_2\text{O}$ ) |
|--------|---------------------------------------|
| 1'     | 58.8                                  |
| 2'     | 75.0                                  |
| 3'     | 75.1                                  |
| 4'     | 74.2                                  |
| 5'     | 64.8                                  |
| 2      | 154.9                                 |
| 4      | 167.9                                 |
| 5      | 110.8                                 |
| 6      | 144.7                                 |

There exists acetate as an impurity in the spectrum from the HPLC purification.

**Figure S11.**  $^1\text{H},^{13}\text{C}$ -HSQC for **5**.

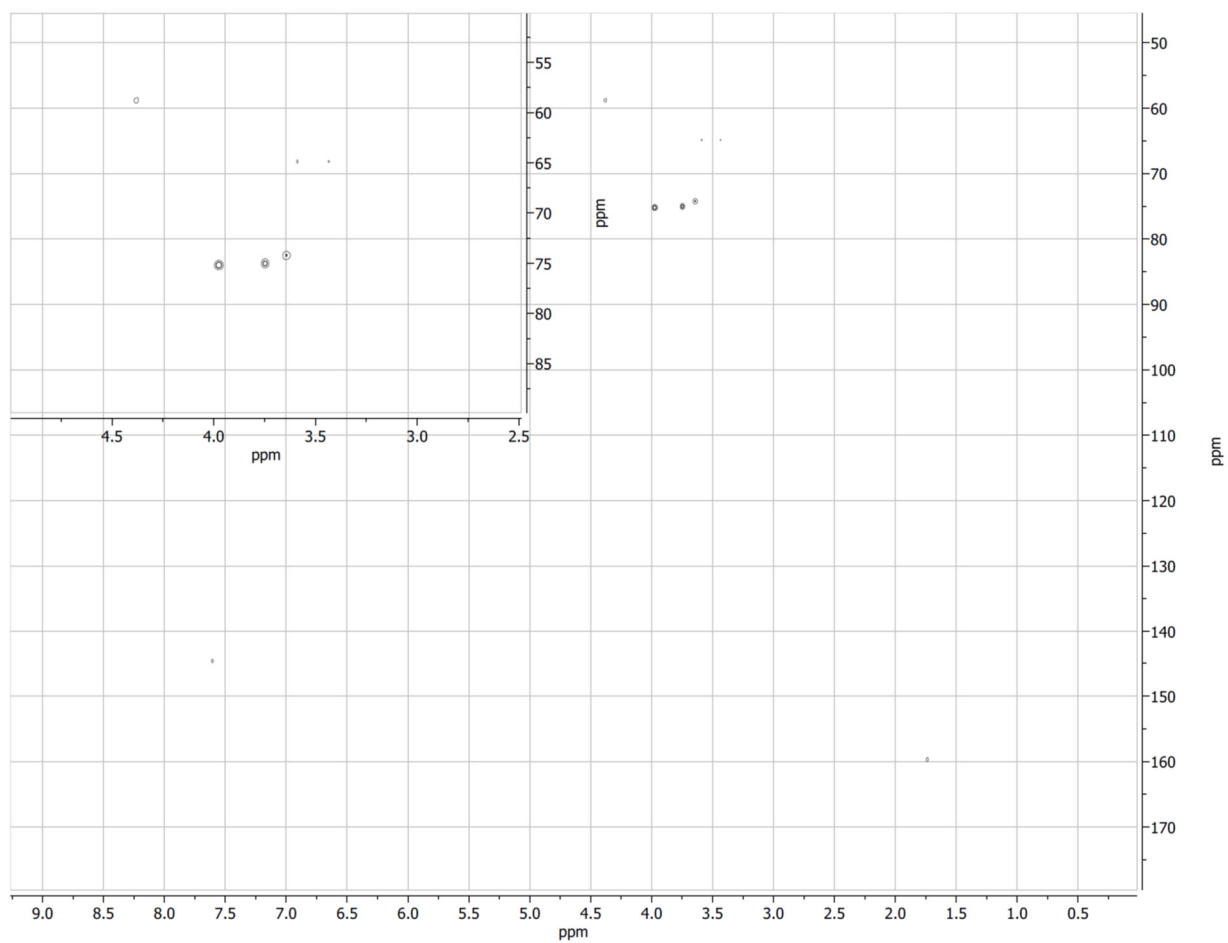

**Figure S12.** Raman spectra for **1** (C-S adduct, red) and **5** (C-O adduct, black).

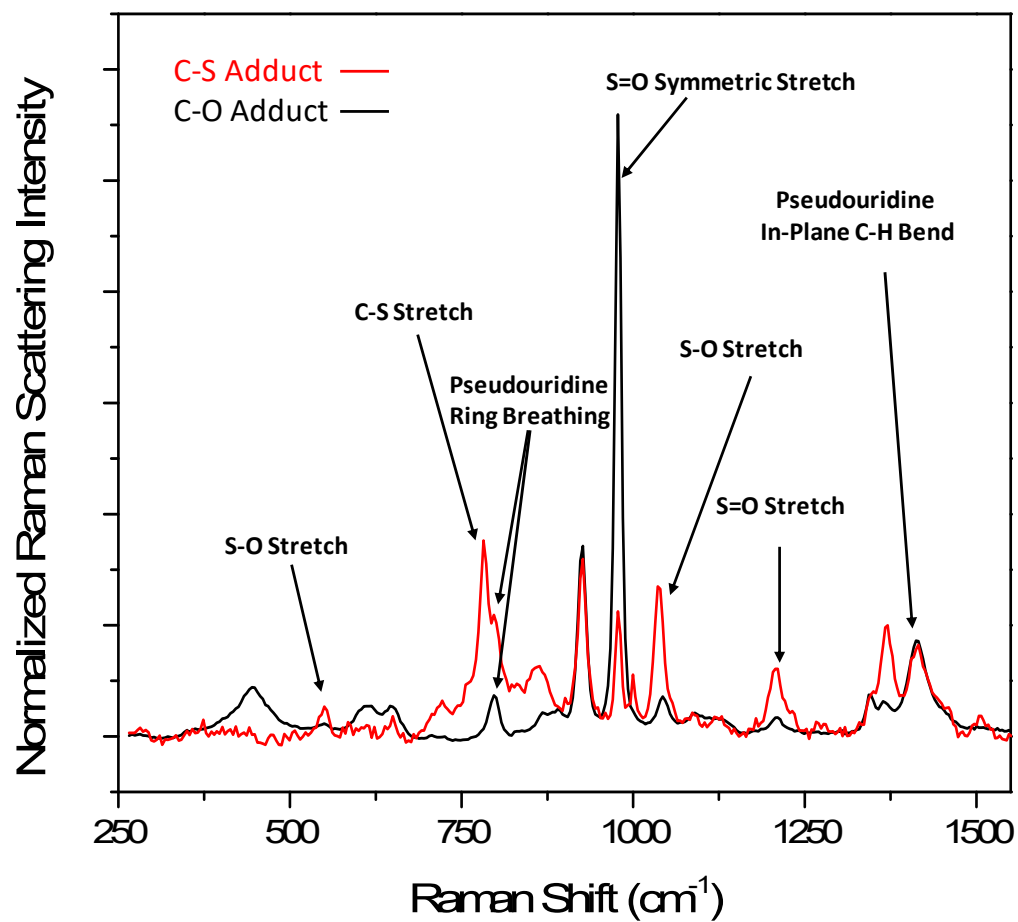

**Figure S13.** DFT optimized energy and coordinates for the (S) isomer of the S adduct

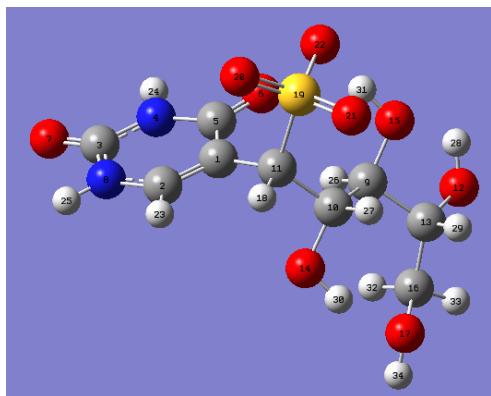

Energy = -1535.99655417 Hartees

| Tag | Symbol | X        | Y        | Z        |
|-----|--------|----------|----------|----------|
| 1   | C      | 1.36687  | -0.14771 | -0.39613 |
| 2   | C      | 2.30487  | -0.47872 | -1.32119 |
| 3   | C      | 3.64951  | -1.80327 | 0.1916   |
| 4   | N      | 2.69777  | -1.4618  | 1.12767  |
| 5   | C      | 1.5481   | -0.67174 | 0.95559  |
| 6   | O      | 0.81166  | -0.4935  | 1.91643  |
| 7   | O      | 4.619    | -2.50495 | 0.43333  |
| 8   | N      | 3.38962  | -1.26708 | -1.0531  |
| 9   | C      | -1.82919 | -0.30199 | 0.51349  |
| 10  | C      | -1.21068 | 0.17764  | -0.81945 |
| 11  | C      | 0.23363  | 0.75793  | -0.81373 |
| 12  | O      | -3.80621 | -0.94427 | 1.73728  |
| 13  | C      | -3.30788 | -0.75474 | 0.41005  |
| 14  | O      | -1.11813 | -0.89197 | -1.76174 |
| 15  | O      | -1.89676 | 0.76214  | 1.46312  |
| 16  | C      | -3.59758 | -2.0695  | -0.30752 |
| 17  | O      | -3.63886 | -1.83054 | -1.72569 |
| 18  | H      | 0.39614  | 0.96936  | -1.87272 |
| 19  | S      | 0.4173   | 2.49442  | -0.15185 |
| 20  | O      | 1.78523  | 2.90124  | -0.57411 |
| 21  | O      | -0.66401 | 3.26918  | -0.82188 |
| 22  | O      | 0.27048  | 2.45297  | 1.33778  |
| 23  | H      | 2.24869  | -0.12992 | -2.34424 |
| 24  | H      | 2.84058  | -1.8326  | 2.05923  |
| 25  | H      | 4.05141  | -1.48357 | -1.78525 |
| 26  | H      | -1.23902 | -1.13015 | 0.91724  |
| 27  | H      | -1.85161 | 0.9741   | -1.2157  |
| 28  | H      | -3.40895 | -0.24129 | 2.27463  |
| 29  | H      | -3.88026 | 0.04286  | -0.0855  |
| 30  | H      | -2.01751 | -1.21194 | -1.97498 |
| 31  | H      | -1.01089 | 1.13209  | 1.64288  |
| 32  | H      | -2.84409 | -2.82691 | -0.06902 |
| 33  | H      | -4.57256 | -2.42632 | 0.032    |
| 34  | H      | -3.84559 | -2.65423 | -2.18359 |

**Figure S14.** DFT optimized energy and coordinates for the (*R*) isomer of the *O* adduct

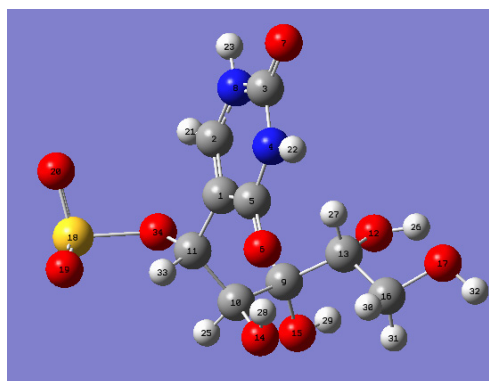

Energy = -1535.444450302 Hartrees

| Tag | Symbol | X        | Y        | Z        |
|-----|--------|----------|----------|----------|
| 1   | C      | -0.55819 | 0.77706  | 0.16462  |
| 2   | C      | -0.94657 | 1.38898  | -0.98029 |
| 3   | C      | -0.14343 | 3.57497  | -0.31315 |
| 4   | N      | 0.23224  | 2.9408   | 0.85741  |
| 5   | C      | 0.08755  | 1.59262  | 1.17489  |
| 6   | O      | 0.50674  | 1.18766  | 2.26607  |
| 7   | O      | 0.03214  | 4.7654   | -0.51766 |
| 8   | N      | -0.73364 | 2.72091  | -1.2195  |
| 9   | C      | 1.26252  | -1.76539 | -0.53838 |
| 10  | C      | 0.28925  | -1.67581 | 0.6476   |
| 11  | C      | -0.8983  | -0.68962 | 0.43256  |
| 12  | O      | 2.99859  | -1.00942 | -1.9318  |
| 13  | C      | 2.40252  | -0.74339 | -0.64787 |
| 14  | O      | 0.92493  | -1.51164 | 1.91439  |
| 15  | O      | 1.80048  | -3.0975  | -0.5461  |
| 16  | C      | 3.48719  | -0.81671 | 0.42285  |
| 17  | O      | 4.54774  | 0.0421   | -0.03959 |
| 18  | S      | -3.49756 | -1.54964 | -0.2682  |
| 19  | O      | -3.58322 | -1.31737 | 1.21648  |
| 20  | O      | -4.16577 | -0.44965 | -1.04239 |
| 21  | H      | -1.46369 | 0.84553  | -1.75783 |
| 22  | H      | 0.67691  | 3.52504  | 1.55547  |
| 23  | H      | -1.04518 | 3.1345   | -2.08734 |
| 24  | H      | 0.65618  | -1.63298 | -1.4433  |
| 25  | H      | -0.19069 | -2.65742 | 0.68029  |
| 26  | H      | 3.87225  | -0.59068 | -1.9242  |
| 27  | H      | 1.98321  | 0.26946  | -0.6599  |
| 28  | H      | 0.84194  | -0.58129 | 2.19784  |
| 29  | H      | 2.42727  | -3.14264 | -1.28194 |
| 30  | H      | 3.10988  | -0.47388 | 1.38589  |
| 31  | H      | 3.8519   | -1.84169 | 0.52692  |
| 32  | H      | 5.3541   | -0.15062 | 0.45211  |
| 33  | H      | -1.471   | -0.72035 | 1.37148  |
| 34  | O      | -1.69008 | -1.1942  | -0.61521 |

**Figure S15.** Decomposition pathways for **2**, **3**, **4**, and **6**.

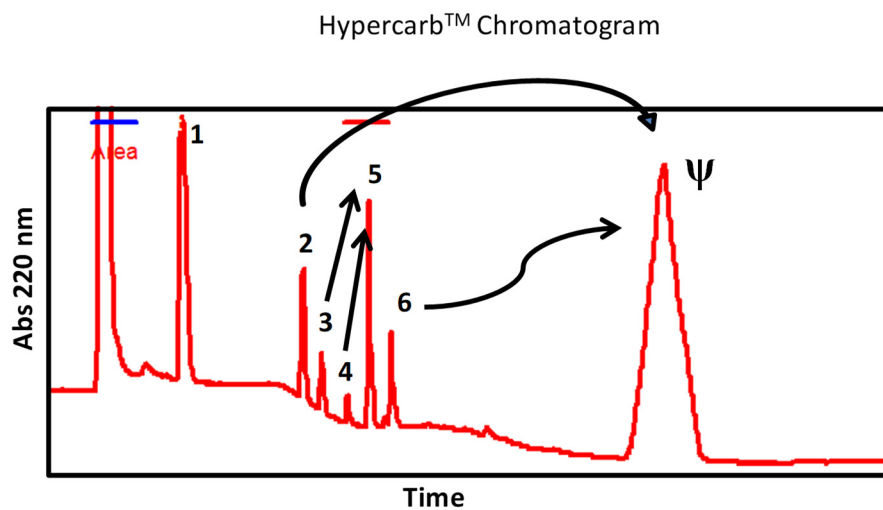

- Peaks **2**, **3**, **4**, and **6** disappear on heating at pH 9 and 70 °C
- **2** and **6** lose bisulfite to give  $\Psi$
- **3** and **4** go to **5**
- **1**, **5** and  $\Psi$  are the final products

Analysis of the desulfonation and  $Mg^{2+}$  dependency in intermediates **2**, **3**, **4**, and **6** degradation in the nucleoside context.

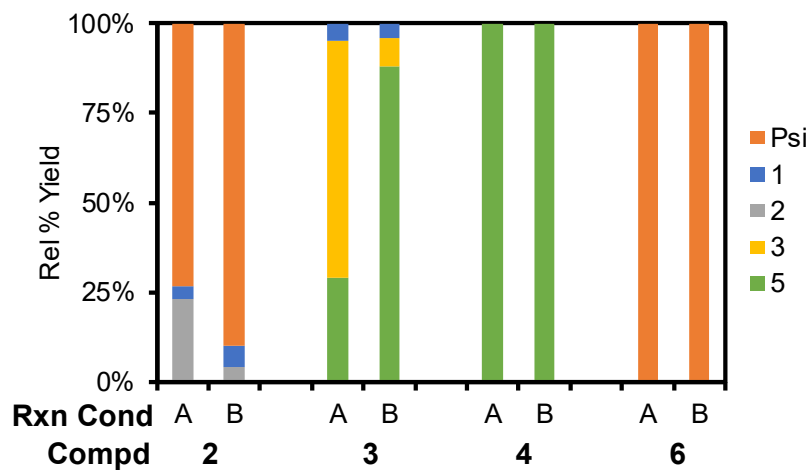

Reaction Conditions-

A = 70 mM Tris (pH 7.4), 10 mM  $MgCl_2$ , 37 °C, 2 h

B = 1 M Tris (pH 9), 37 °C, 2 h (established desulfonation conditions).

**Figure S16.**  $^1\text{H-NMR}$  for **2**.

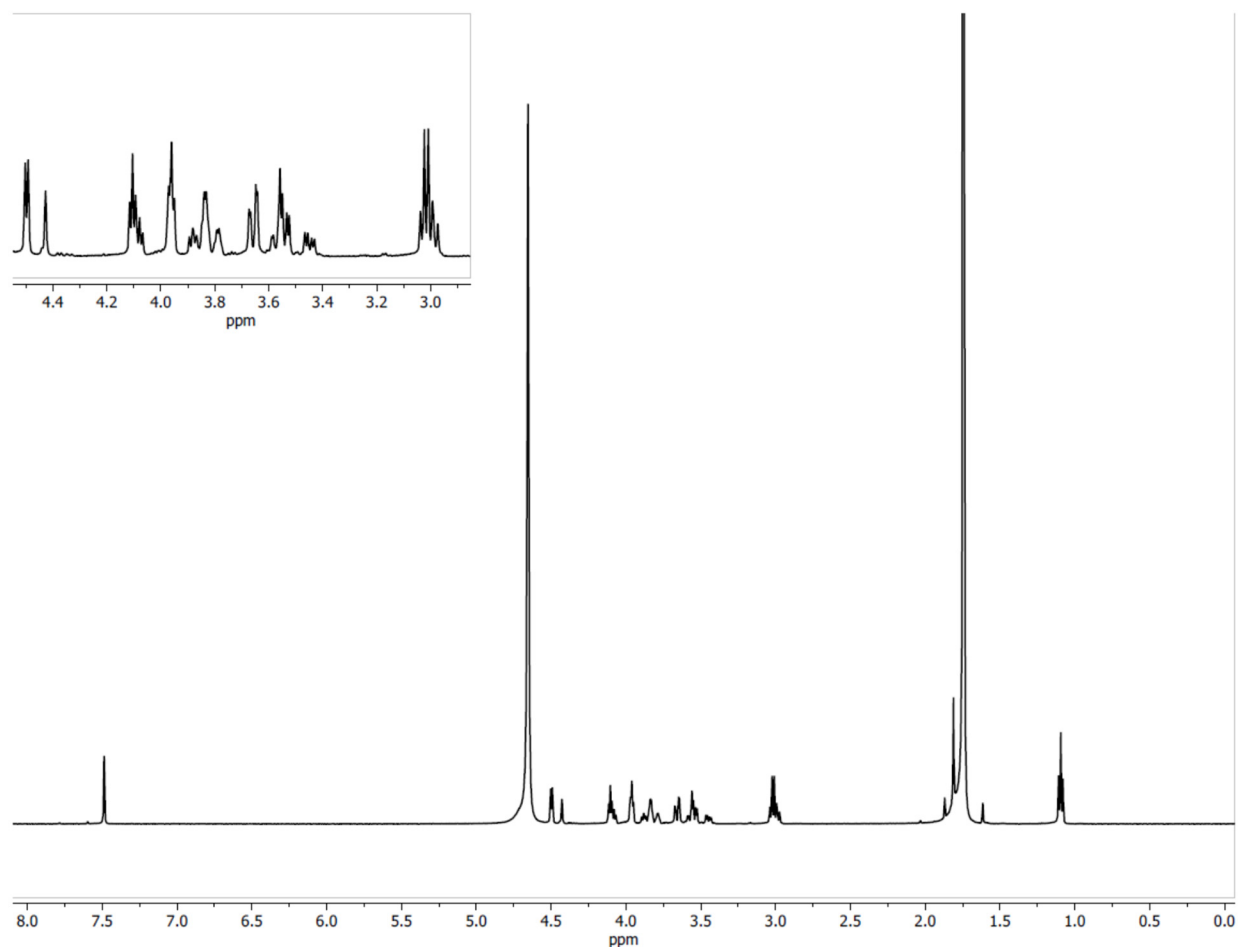

\*This spectrum represents a mixture of **2** and its decomposition product  $\Psi$ . There exists acetate as an impurity in the spectrum from the HPLC purification.

| Proton Resonances |            |
|-------------------|------------|
| Pseudouridine     | Compound 2 |
| 4.51              | 4.43       |
| 4.13              | 3.97       |
| 4.07              | 3.89       |
| 3.84              | 3.79       |
| 3.67              | 3.46       |
| 3.58              | n.d.       |

Resonances for  $\Psi$  were reported in Wishard, D.S.; et al. *Nucleic Acids Res.* **2009**, *37*, D603, in addition to recording the spectra on our spectrometer. Lastly, n.d. = not detected that results from this peak most likely overlapped with a peak from  $\Psi$ .

**Figure S17.**  $^{13}\text{C}$ -NMR for **2**.

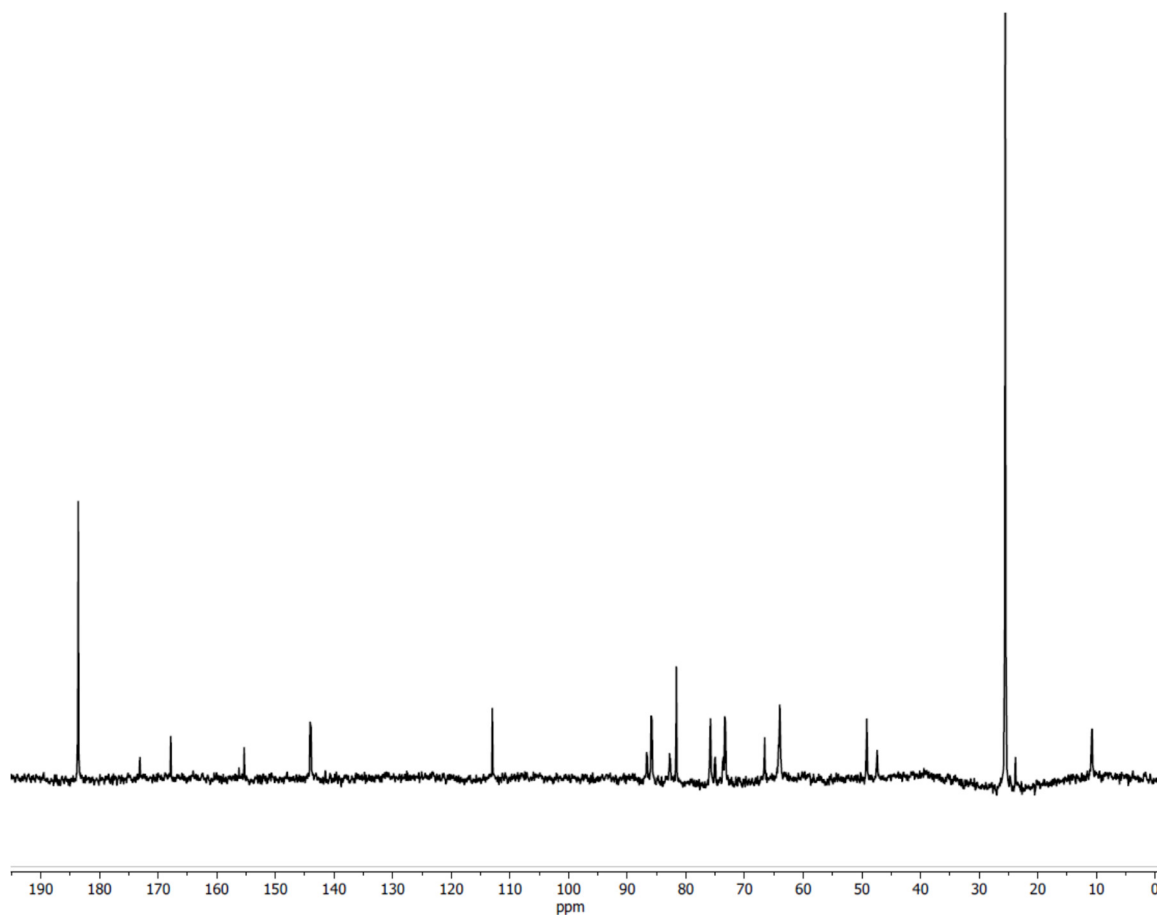

\*This spectrum represents a mixture of **2** and its decomposition product  $\Psi$ . There exists acetate as an impurity in the spectrum from the HPLC purification.

| Carbon Resonances |            |
|-------------------|------------|
| Pseudouridine     | Compound 2 |
| 167.8             | 173.1      |
| 155.3             | 143.9      |
| 144.1             | 86.7       |
| 113.0             | 82.6       |
| 85.8              | 75.0       |
| 81.6              | 73.6       |
| 75.8              | 73.2       |
| 73.4              | 66.6       |
| 64.0              | 64.1       |

Resonances for  $\Psi$  were reported in Wishard, D.S.; et al. *Nucleic Acids Res.* **2009**, *37*, D603, in addition to recording the spectra on our spectrometer.



**Figure S18.** Anion-exchange HPLC analysis of bisulfite treated RNA.

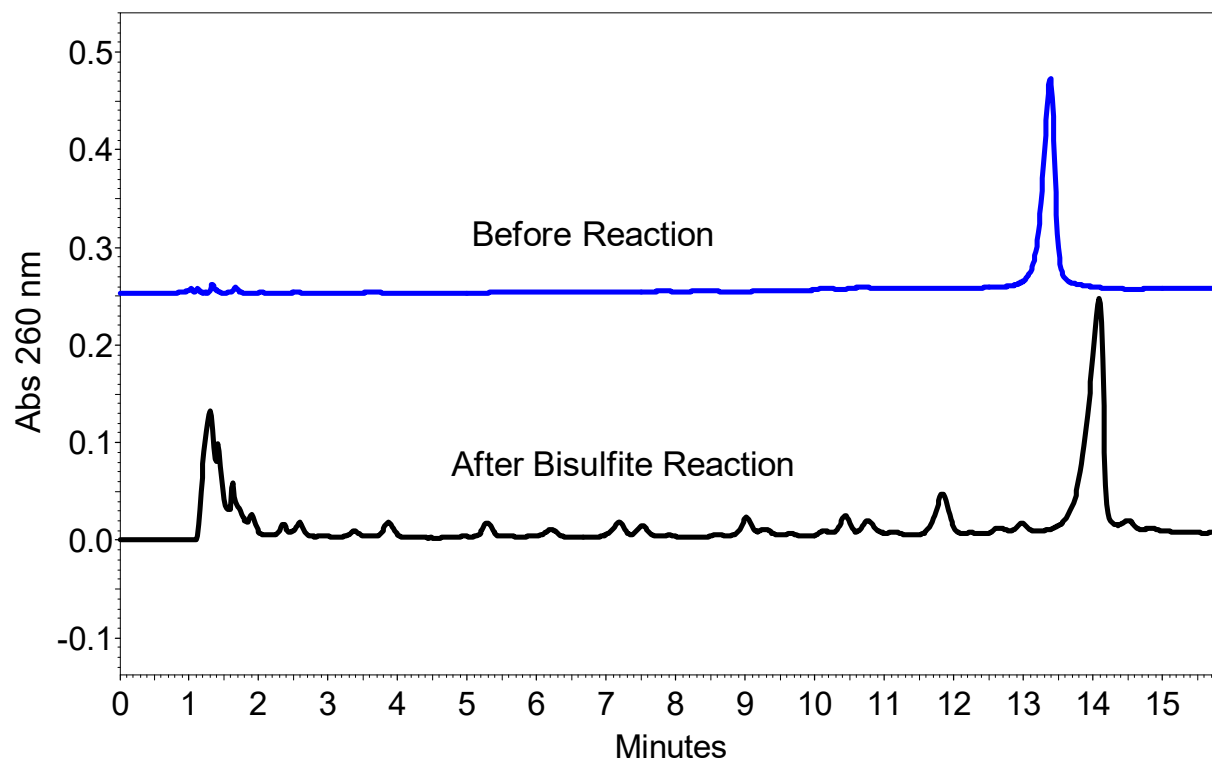

**Figure S19.** UV-vis spectra for **2**, **3**, **4**, and **6**.

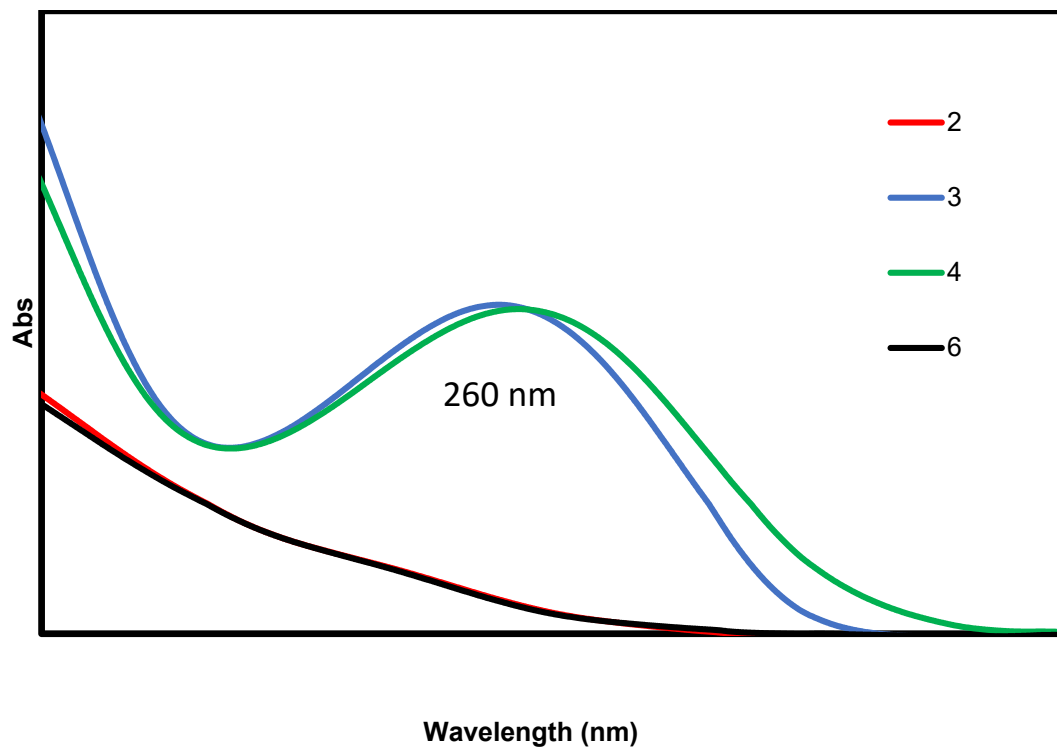

The UV-vis spectra were recorded during the HPLC analysis running the A line as 20 mM  $\text{NH}_4\text{OAc}$  (pH 7) and the B line as MeOH. The HPLC method and retention times are reported in the methods section for the compounds for readers that are interested in the exact solvent composition each compound was recorded.

**Figure S20.** pH titrations of  $\Psi$ , 1, and 5 monitored by UV-vis.

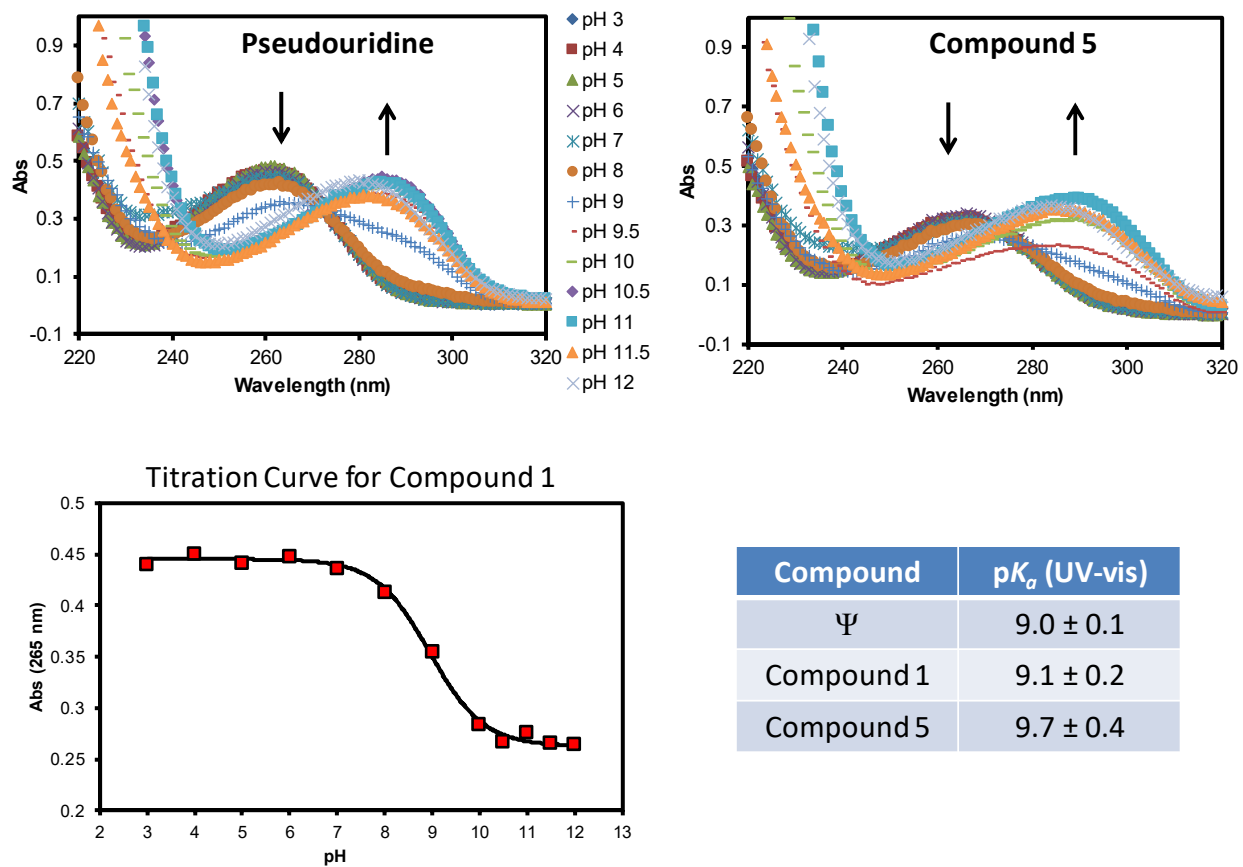

| Compound   | $pK_a$ (UV-vis) |
|------------|-----------------|
| $\Psi$     | $9.0 \pm 0.1$   |
| Compound 1 | $9.1 \pm 0.2$   |
| Compound 5 | $9.7 \pm 0.4$   |
